# Supplementary material
Source: HighWire-hosted journal article supplement (https://erj.ersjournals.com/content/57/4/2100753)
Supplement: inline-supplementary-material-1 [file inline-supplementary-material-1.pdf]

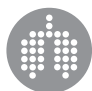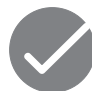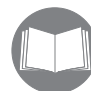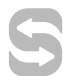

SHAREABLE PDF

# Guideline-directed management of COVID-19: Do's and Don'ts

Martin Kolb <sup>1</sup>, Anh Tuan Dinh-Xuan <sup>2</sup> and Laurent Brochard<sup>3,4</sup>

**Affiliations:** <sup>1</sup>McMaster University, Firestone Institute for Respiratory Health, Hamilton, ON, Canada. <sup>2</sup>Service de Physiologie-Explorations Fonctionnelles, Assistance Publique-Hôpitaux de Paris (AP-HP), APHP-CUP, Hôpital Cochin, Université de Paris, Paris, France. <sup>3</sup>Keenan Research Centre, Li Ka Shing Knowledge Institute, St Michael's Hospital, Unity Health Toronto, Toronto, ON, Canada. <sup>4</sup>University of Toronto, Interdepartmental Division of Critical Care Medicine, Toronto, ON, Canada.

**Correspondence:** Martin Kolb, Firestone Institute for Respiratory Health, McMaster University, 50 Charlton Avenue East, Room T2120, Hamilton, ON L8N 4A6, Canada. E-mail: kolbm@mcmaster.ca

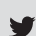

@ERSpublications

**This editorial summarises the highlights of the European Respiratory Society COVID-19 treatment guideline** <https://bit.ly/3tClBRe>

**Cite this article as:** Kolb M, Dinh-Xuan AT, Brochard L. Guideline-directed management of COVID-19: Do's and Don'ts. *Eur Respir J* 2021; 57: 2100753 [https://doi.org/10.1183/13993003.00753-2021].

This single-page version can be shared freely online.

The coronavirus disease 2019 (COVID-19) pandemic continues to dominate our daily lives. The “second wave” has slowed down in most regions around the globe, just to give way to the third wave of infections. Hospitalisations and death are again on the rise despite public health measures and vaccination programmes. Unfortunately, we have to expect that COVID-19 will persist as a major challenge for the delivery of medical care for a long while to go. Despite all efforts, a significant number of patients, in particular the elderly and those with risk factors, will get ill from this disease and some will eventually require hospitalisation.
